# Supplementary material for: Effects of an injectable functionalized self-assembling nanopeptide hydrogel on angiogenesis and neurogenesis for regeneration of the central nervous system
Source: Royal Society of Chemistry journal article supplement (doi:10.1039/c7nr06528k), 2017-01-01
Supplement: c7nr06528k1.pdf [file c7nr06528k1.pdf]

Electronic Supplementary Material (ESI) for Nanoscale.  
This journal is © The Royal Society of Chemistry 2016

## Electronic Supplementary Information

### Injectable Functionalized Self-assembling Nanopeptide Hydrogel on Angiogenesis and Neurogenesis for Central Nervous System Regeneration

Tzu-Wei Wang<sup>a\*</sup>, Kai-Chieh Chang<sup>a</sup>, Liang-Hsin Chen<sup>a</sup>, Shih-Yung Liao<sup>b</sup>, Chia-Wei Yeh<sup>a</sup>, Yung-Jen Chuang<sup>c</sup>

<sup>a</sup> Department of Materials Science and Engineering, National Tsing Hua University, Hsinchu, Taiwan

<sup>b</sup> Department of Biomedical Engineering and Environmental Sciences, National Tsing Hua University, Hsinchu, Taiwan

<sup>c</sup> Department of Medical Science & Institute of Bioinformatics and Structural Biology, National Tsing Hua University, Hsinchu, Taiwan

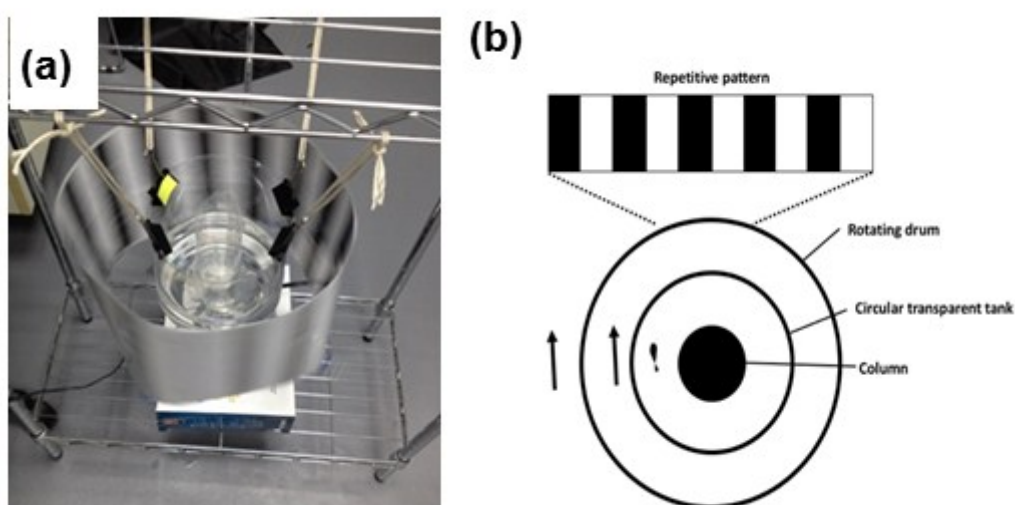

**Figure S1.** (a) Image of zebrafish optomotor response apparatus. (b) Zebrafish was placed in the circular transparent tank surrounded by a drum with repetitive black and white stripes. The animal optomotor response examination was conducted with stimulus from drum clockwise and counterclockwise rotation.

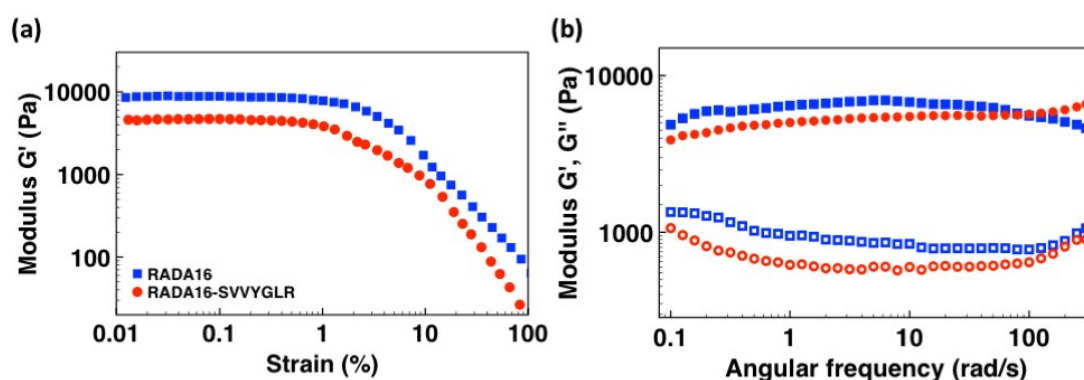

**Figure S2.** Rheological behavior of 2% (w/v) peptide hydrogel. (a) Strain sweep of RADA16 and RADA16-SVVYGLR at pH7 condition.  $\square$ :  $G'$  of RADA16;  $\bullet$ :  $G'$  of RADA16-SVVYGLR. (b) Frequency sweep of RADA16 and RADA16-SVVYGLR at pH7 condition.  $\square$ :  $G'$  of RADA16;  $\bullet$ :  $G'$  of RADA16-SVVYGLR;  $\square$ :  $G''$  of RADA16;  $\circ$ :  $G''$  of RADA16-SVVYGLR.
